# Supplementary material for: Chromatic Acclimation Processes and Their Relationships with Phycobiliprotein Complexes
Source: MDPI journal article supplement (doi:10.3390/microorganisms10081562), 2022-08-03
Supplement: s1 [file s1]

## Appendix S1

### FaRLiP cluster information from five incomplete genome drafts

#### 1. *Calothrix* sp. NIES-3974 incomplete genome draft

Scaffold [Calothrix sp. NIES-3974 : Ga0263577\\_11 \(5985875bp\)](#) contains small photosystem I subunits of PsaJ and PsaF, Photosystem II subunits, allophycocyanin subunits and *rfpBAC* operon. The genes *psaA/psaB* are placed in a different position.

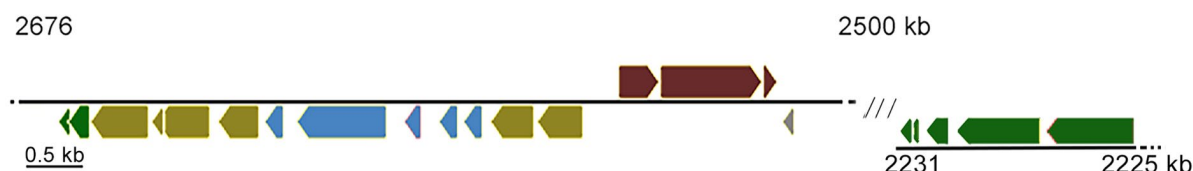

#### 2. *Nodosilinea* sp. LEGE 07298 incomplete genome draft

Scaffold [Ga0481345\\_168 : Nodosilinea sp. LEGE 07298 \(13672bp\)](#) contains *psaA/psaB* and allophycocyanin of ApcD and ApcB, partial ApcE. Scaffold [Ga0481345\\_258 : Nodosilinea sp. LEGE 07298 \(9293bp\)](#) start from partial ApcE encoding gene that next to ApcD. Then photosystem II encoded genes. However, with short scaffolds, we could not map the position of *rfpBAC* operon associated with the partial FaRLiP cluster.

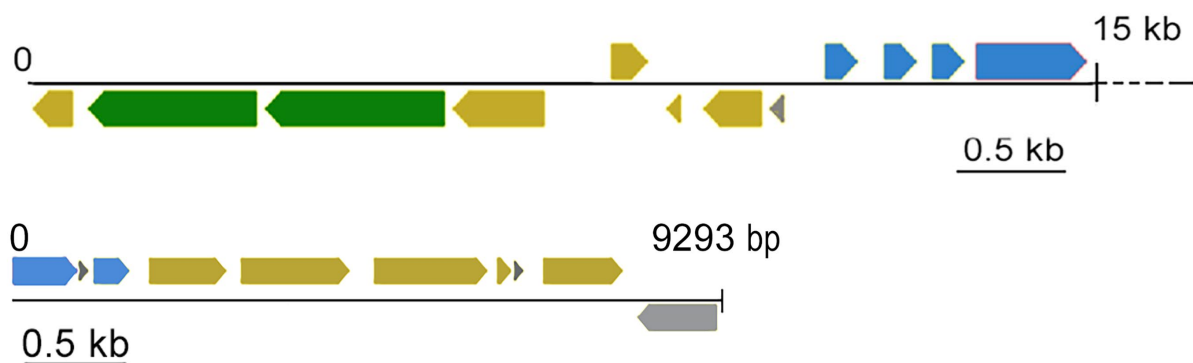

#### 3. *Nodosilinea* sp. P-1105 incomplete genome draft

Five Allophycocyanin encoding genes are clustered with photosystem II gene in Scaffold: [Ga0442552\\_125 : Nodosilinea sp. P-1105 \(55594bp\)](#). One PsaA (without paired *psaB* gene) encoded gene at the end of this scaffold. There are three annotated *psaA/psaB* genes and 2 pairs of *psaA/psaB* found in the scaffolds. The third *psaB* gene (not paired with *psaA*) is localised in scaffold [Ga0442552\\_194 : Nodosilinea sp. P-1105 \(14349bp\)](#), containing *rfpBAC* operon.

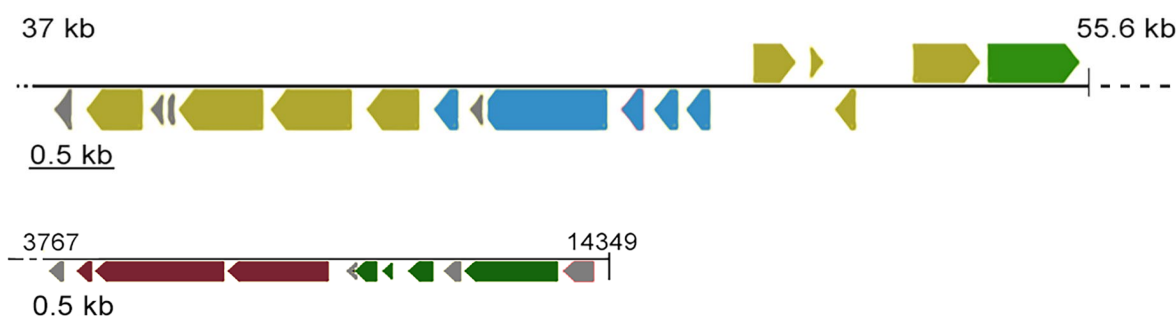

#### 4. *Plectonema cf. radiosum* LEGE 06105 incomplete genome draft

Scaffold [Ga0481330\\_094 : \*Plectonema c\* \*f. radiosum\* LEGE 06105 \(29067bp\)](#) contains *rfpBAC* operon, allophycocyanin subunits and photosystem II encoded genes. Additionally, 2 PsaA and PsaB encoded genes in two different scaffold supports the presence of FaRLiP cluster.

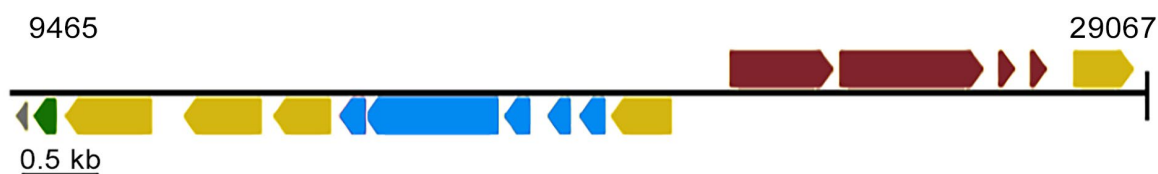

#### 5. *Pleurocapsales cyanobacterium* LEGE 10410 incomplete genome draft

Scaffold [Ga0481350\\_028 : \*Pleurocapsales cyanobacterium\* LEGE 10410 \(20487bp\)](#) contains allophycocyanin subunits and photosystem II encoded genes. 2 copies of *psaA* /*psaB*, in which a pair of *psaA*/*psaB* are next to the predicted *rfpBAC* operon in scaffold [Ga0481350\\_034 : \*Pleurocapsales cyanobacterium\* LEGE 10410 \(20063bp\)](#).

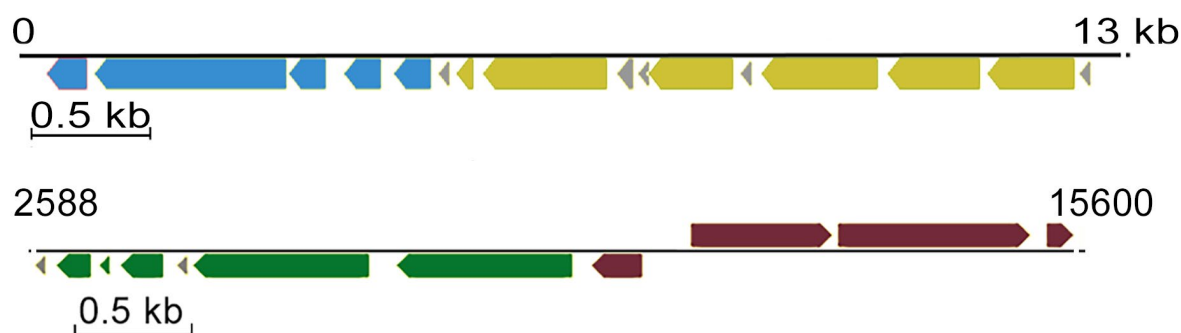

\*Colour codes: Photosystem I, Photosystem II, Allophycocyanin, *rfpBAC* operon, and hypothetical proteins.

Supplementary Table S1. Genetic information of selected 65 cyanobacteria

| Cyanobacteria                                | CA types          | *Photoreceptor<br>/the numbers<br>of GAF-<br>containing<br>proteins | Chloroph<br>ylls | Phycobili-proteins | Bilin<br>chromophor<br>es | Core-Linker proteins (x<br>numbers) | Taxonomy<br>(order/family)             | Genome Accession                                                                                               | Photoreceptors<br>accessions   | ApcE<br>Accession (CA6-<br>cyanobacteria) | CpcG Accessions                                | CpcL<br>Accessions                    |
|----------------------------------------------|-------------------|---------------------------------------------------------------------|------------------|--------------------|---------------------------|-------------------------------------|----------------------------------------|----------------------------------------------------------------------------------------------------------------|--------------------------------|-------------------------------------------|------------------------------------------------|---------------------------------------|
| <i>Acaryochloris marina</i> MBIC11017        | CA5               | N.F./ 13                                                            | <i>a, d</i>      | APC/ PC            | PCB                       | CpcL×3                              | Synechococcales/<br>Acaryochloridaceae | CP000843, CP000839,<br>CP000841, CP000846,<br>CP000844, CP000842,<br>CP000838, CP000840,<br>CP000828, CP000845 |                                |                                           |                                                | AM1_C0092,<br>AM1_C0102,<br>AM1_C0203 |
| <i>Acaryochloris</i> sp. CCMEE 5410          | N.F               | N.F./17                                                             | <i>a, d</i>      | APC                | PCB                       | N.F.                                | Synechococcales/<br>Acaryochloridaceae | AFEJ000000000                                                                                                  |                                |                                           |                                                |                                       |
| <i>Anabaena</i> sp. PCC 7108                 | CA7               | CcaS /15                                                            | <i>a</i>         | APC/ PC            | PCB                       | ApcE×1/ CpcG×3                      | Nostocales/<br>Nostocaceae             | AJWF000000000                                                                                                  | WP_016952251                   |                                           | WP_016950360,<br>WP_016950361,<br>WP_016950362 |                                       |
| <i>Calothrix brevissima</i> NIES-22          | CA1/ CA2/<br>CA3  | CcaS +<br>RcaE/37                                                   | <i>a</i>         | APC/ PC/ PE        | PCB/ PEB                  | ApcE×1/ CpcG×2/ CpcL×2              | Nostocales/<br>Calotrichaceae          | AP018215, AP018213,<br>AP018207, AP018211,<br>AP018209, AP018214,<br>AP018212, AP018210,<br>AP018208           | WP_096645556/<br>WP_096646471  |                                           | WP_096645558,<br>WP_096646466                  | WP_096645555,<br>WP_096645004         |
| <i>Calothrix desertica</i> PCC 7102          | N.F. <sup>b</sup> | N.F./27                                                             | <i>a</i>         | APC/ PC            | PCB                       | ApcE×1/ CpcG×1/ CpcL×1              | Nostocales/<br>Calotrichaceae          | NZ_VLKB000000000                                                                                               |                                |                                           | WP_127082892                                   | WP_127082891                          |
| <i>Calothrix parasitica</i> NIES-267         | CA6               | RfpA /22                                                            | <i>a, f</i>      | APC/ PC            | PCB                       | ApcE×2/ CpcG×3/ CpcL×1              | Nostocales/<br>Calotrichaceae          | AP018230, AP018232,<br>AP018228, AP018227,<br>AP018229, AP018231                                               | WP_096658604                   | WP_096658610,<br>WP_096655631             | WP_096654956,<br>WP_096654958,<br>WP_096654960 | WP_096661134                          |
| <i>Calothrix</i> sp. 336/3                   | CA1/ CA2/<br>CA3  | CcaS +<br>RcaE/17                                                   | <i>a</i>         | APC/ PC/ PE        | PCB/ PEB                  | ApcE×1/ CpcG×2/ CpcL×2              | Nostocales/<br>Calotrichaceae          | CP011383, CP011385,<br>CP011384, CP011382                                                                      | WP_082127326/<br>WP_2338178504 |                                           | WP_035159010,<br>WP_035153937                  | WP_035153901,<br>WP_035153933         |
| <i>Calothrix</i> sp. NIES-2098               | CA3               | RcaE / 31                                                           | <i>a</i>         | APC/ PC/ PE        | PCB/ PEB                  | ApcE×1/ CpcG×2/ CpcL×1              | Nostocales/<br>Calotrichaceae          | AP018173, AP018172                                                                                             | WP_096589648                   |                                           | WP_096588437,<br>WP_096589657                  | WP_096588435                          |
| <i>Calothrix</i> sp. NIES-2100               | CA1/ CA2/<br>CA3  | CcaS +<br>RcaE/40                                                   | <i>a</i>         | APC/ PC/ PE        | PCB/ PEB                  | ApcE×1/ CpcG×1/ CpcL×2              | Nostocales/<br>Calotrichaceae          | AP018179, AP018178                                                                                             | WP_096697252/<br>WP_096598684  |                                           | WP_06607250                                    | WP_096607253,<br>WP_096605772         |
| <i>Calothrix</i> sp. NIES-3974               | CA1/ CA2/<br>CA6  | CcaS + RfpA<br>/12                                                  | <i>a, f</i>      | APC/ PC/ PE        | PCB/ PEB                  | ApcE×2/ CpcG×3/ CpcL×2              | Nostocales/<br>Calotrichaceae          | AP018254                                                                                                       | WP_096620213/<br>WP_096625932  | WP_096620787,<br>BAZ05880                 | WP_096620257,<br>WP_096621832,<br>WP_096621834 | WP_096625075,<br>WP_096620258         |
| <i>Calothrix</i> sp. NIES-4101               | CA1/ CA2          | CcaS / 28                                                           | <i>a</i>         | APC/ PC/ PE        | PCB/ PEB                  | ApcE×1/ CpcG×2/ CpcL×2              | Nostocales/<br>Calotrichaceae          | AP018279, AP018280,<br>AP018275, AP018277,<br>AP018278, AP018274,<br>AP018276                                  | BAZ37790                       |                                           | BAZ38426,<br>BAZ41692                          | BAZ38425,<br>BAZ38136                 |
| <i>Calothrix</i> sp. PCC 7103                | CA1/ CA2          | CcaS /29                                                            | <i>a</i>         | APC/ PC/ PE        | PCB/ PEB                  | ApcE×1/ CpcG×2/ CpcL×1              | Nostocales/<br>Calotrichaceae          | ALVJ000000000                                                                                                  | WP_019489881                   |                                           | WP_019488565,<br>WP_019495782                  | WP_019495781                          |
| <i>Calothrix</i> sp. PCC 7507                | CA6               | RfpA / 22                                                           | <i>a, d, f</i>   | APC/ PC            | PCB                       | ApcE×2/ CpcG×3/ CpcL×1              | Nostocales/<br>Calotrichaceae          | CP003943                                                                                                       | WP_015126594                   | WP_015126587,<br>WP_015126818             | WP_015129903,<br>WP_015129904,<br>WP_015129906 | WP_015129905                          |
| <i>Chamaesiphon minutus</i> PCC<br>6605      | CA3               | RcaE / 18                                                           | <i>a</i>         | APC/ PC/ PE        | PCB/ PEB                  | ApcE×1/ CpcG×2/ CpcL×1              | Synechococcales/<br>Chamaesiphonaceae  | CP003602, CP003601,<br>CP003600                                                                                | WP_015161117                   |                                           | WP_015158278,<br>WP_015160460                  | WP_015160046                          |
| <i>Chamaesiphon polymorphus</i><br>CCALA 037 | CA3               | RcaE / 15                                                           | <i>a</i>         | APC/ PC/ PE        | PCB/ PEB                  | ApcE×1/ CpcG×2/ CpcL×1              | Synechococcales/<br>Chamaesiphonaceae  | PVWO000000000                                                                                                  | WP_106310833                   |                                           | WP_106306223,<br>WP_106307793                  | WP_106312097                          |

|                                                                       |      |           |                |             |          |                        |                                                  |                                                                                                      |              |                               |                                                |                               |
|-----------------------------------------------------------------------|------|-----------|----------------|-------------|----------|------------------------|--------------------------------------------------|------------------------------------------------------------------------------------------------------|--------------|-------------------------------|------------------------------------------------|-------------------------------|
| <i>Chlorogloeopsis fritschii</i> PCC 6912                             | CA6  | RfpA /25  | <i>a, d, f</i> | APC/ PC     | PCB      | ApcE×2/ CpcG×3/ CpcL×1 | Nostocales/<br>Chlorogloeopsidaceae              | AJLN00000000                                                                                         | WP_016879258 | WP_016873423,<br>WP_016874650 | WP_016874681,<br>WP_016874680,<br>WP_016874678 | WP_016874679                  |
| <i>Chondrocystis</i> sp. NIES-4102                                    | CA3  | RcaE /9   | <i>a</i>       | APC/ PC/ PE | PCB/ PEB | ApcE×1/ CpcG×1         | Chroococcales/<br>Chroococcaceae                 | AP018287, AP018282,<br>AP018284, AP018286,<br>AP018283, AP018285,<br>AP018281                        | WP_096722896 |                               | WP_096722389                                   |                               |
| <i>Chroococcidiopsis thermalis</i> PCC 7203                           | CA6  | RfpA /19  | <i>a, d, f</i> | APC/ PC     | PCB      | ApcE×2/ CpcG×3         | Chroococcidiopsidales/<br>Chroococcidiopsidaceae | CP003598, CP003597,<br>CP003599                                                                      | WP_015153109 | WP_015153116,<br>WP_015156255 | WP_015155417,<br>WP_015155418,<br>WP_015155419 |                               |
| <i>Fischerella muscicola</i> PCC 7414                                 | CA6  | RfpA /29  | <i>a, f</i>    | APC/ PC     | PCB      | ApcE×2/ CpcG×3/ CpcL×1 | Nostocales/<br>Hapalosiphonaceae                 | AJLK00000000                                                                                         | WP_102204993 | WP_016866291,<br>WP_016868701 | WP_016866766,<br>WP_016866768,<br>WP_016866769 | WP_016866767                  |
| <i>Fischerella</i> sp. NIES-4106                                      | CA6  | RfpA /22  | <i>a, f</i>    | APC/ PC     | PCB      | ApcE×2/ CpcG×3/ CpcL×1 | Nostocales/<br>Hapalosiphonaceae                 | AP018299, AP018303,<br>AP018298, AP018300,<br>AP018304, AP018302,<br>AP018301, AP018306,<br>AP018305 | WP_096680226 | WP_096678225,<br>WP_096680239 | WP_096677901,<br>WP_096677903,<br>WP_096677904 | WP_096677902                  |
| <i>Fischerella</i> sp. PCC 9605                                       | CA6  | RfpA /26  | <i>a, f</i>    | APC/ PC     | PCB      | ApcE×2/ CpcG×3/ CpcL×1 | Nostocales/<br>Hapalosiphonaceae                 | ALVT00000000                                                                                         | WP_026734721 | WP_026734727,<br>WP_026731017 | WP_026736671,<br>WP_026736672,<br>WP_026736674 | WP_026736673                  |
| <i>Fischerella thermalis</i> PCC 7521                                 | CA6  | RfpA /20  | <i>a, d, f</i> | APC/ PC     | PCB      | ApcE×2/ CpcG×3/ CpcL×1 | Nostocales/<br>Hapalosiphonaceae                 | AJLL00000000                                                                                         | WP_102148434 | WP_009453699,<br>WP_009457006 | WP_009454953,<br>WP_009454957,<br>WP_016871767 | WP_009454955                  |
| <i>Fortiea contorta</i> PCC 7126                                      | CA3  | RcaE / 16 | <i>a</i>       | APC/ PC/ PE | PCB/ PEB | ApcE×1/ CpcG×1         | Nostocales/ Fortieaceae                          | ANFJ00000000                                                                                         | WP_017653340 |                               | WP_017653030                                   |                               |
| <i>Fremyella diplosiphon</i> Fd33/<br><i>Tolypothrix</i> sp. PCC 7601 | CA3  | RcaE /36  | <i>a</i>       | APC/ PC/ PE | PCB/ PEB | ApcE×1/ CpcG×1/ CpcL×1 | Nostocales/<br>Tolypothrichaceae                 | AGCR00000000                                                                                         | WP_045871568 |                               | WP_045871433                                   | WP_045872077                  |
| <i>Geminocystis</i> sp. NIES-3708                                     | CA2  | CcaS / 8  | <i>a</i>       | APC/ PC/ PE | PCB/ PEB | ApcE×1/ CpcG×1         | Chroococcales/<br>Chroococcaceae                 | AP014817, AP014815,<br>AP014819, AP014816,<br>AP014818, AP014820                                     | WP_197671694 |                               | WP_066343099                                   |                               |
| <i>Gloeobacter violaceus</i> PCC 7421                                 | N.F. | N.F./ 1   | <i>a</i>       | APC/ PC/ PE | PCB/ PEB | ApcE×1                 | Gloeobacterales/<br>Gloeobacteraceae             | NC_005125                                                                                            |              |                               |                                                |                               |
| <i>Halomicronema hongdechloris</i>                                    | CA6  | RfpA /9   | <i>a, f</i>    | APC/ PC     | PCB      | ApcE×2/ CpcG×1         | Pseudanabaenales/<br>Prochlorotrichaceae         | CP021983                                                                                             | WP_080806407 | WP_080806386,<br>WP_080813471 | WP_080808221                                   |                               |
| <i>Leptolyngbya boryana</i> PCC 6306                                  | CA1  | CcaS /13  | <i>a</i>       | APC/ PC     | PCB      | ApcE×1/ CpcG×2/ CpcL×1 | Pseudanabaenales/<br>Leptolyngbyaceae            | ALVM00000000                                                                                         | WP_017290979 |                               | WP_017286918,<br>WP_017288649                  | WP_026148987                  |
| <i>Leptolyngbya</i> sp. Heron Island J                                | CA3  | RcaE /9   | <i>a</i>       | APC/ PC/ PE | PCB/ PEB | ApcE×1/ CpcG×1/ CpcL×2 | Pseudanabaenales/<br>Leptolyngbyaceae            | AWNH00000000                                                                                         | WP_023076387 |                               | WP_023072014                                   | WP_023072999,<br>WP_023073188 |
| <i>Leptolyngbya</i> sp. NIES-2104                                     | N.F. | N.F./10   | <i>a</i>       | APC/ PC     | PCB      | ApcE×1/ CpcG×3         | Pseudanabaenales/<br>Leptolyngbyaceae            | BBWW00000000                                                                                         |              |                               | WP_058997656,<br>WP_058997658,<br>WP_058997660 |                               |
| <i>Leptolyngbya</i> sp. NIES-3755                                     | N.F. | N.F./13   | <i>a</i>       | APC/ PC     | PCB      | ApcE×1/ CpcG×3         | Pseudanabaenales/<br>Leptolyngbyaceae            | AP017308, AP017310,<br>AP017311, AP017309                                                            |              |                               | WP_068390530,<br>WP_068390532,<br>WP_068390535 |                               |
| <i>Leptolyngbya</i> sp. PCC 6406                                      | CA1  | CcaS / 15 | <i>a</i>       | APC/ PC     | PCB      | ApcE×1/ CpcG×1/ CpcL×2 | Pseudanabaenales/<br>Leptolyngbyaceae            | ALVV00000000                                                                                         | WP_008314551 |                               | WP_008310042                                   | WP_008314556,<br>WP_008308963 |

|                                                                                  |          |                  |             |             |          |                        |                                          |                                                                                                      |                               |                                       |                                                 |                               |
|----------------------------------------------------------------------------------|----------|------------------|-------------|-------------|----------|------------------------|------------------------------------------|------------------------------------------------------------------------------------------------------|-------------------------------|---------------------------------------|-------------------------------------------------|-------------------------------|
| <i>Mastigocoleus testarum</i> BC008                                              | CA3/ CA6 | RcaE + RfpA / 40 | <i>a, f</i> | APC/ PC/ PE | PCB/ PEB | ApcE×3/ CpcG×1/ CpcL×2 | Nostocales/<br>Hapalosiphonaceae         | LMTZ00000000                                                                                         | WP_058184871/<br>WP_036267670 | WP_036265308,<br>Ga0125915_110<br>724 | WP_027840162                                    | WP_036265220,<br>WP_027840161 |
| <i>Microcystis</i> sp. MC19                                                      | CA2      | CcaS / 5         | <i>a</i>    | APC/ PC/ PE | PCB/ PEB | ApcE×1/ CpcG×1         | Chroococcales/<br>Microcystaceae         | CP020664                                                                                             | WP_106908049                  |                                       | WP_045359953                                    |                               |
| <i>Moorea bouillonii</i> PNG5-198                                                | CA3      | RcaE /11         | <i>a</i>    | APC/ PC/ PE | PCB/ PEB | ApcE×1/ CpcG×1/ CpcL×1 | Oscillatoriales/<br>Oscillatoriaceae     | MKZS00000000                                                                                         | WP_075901034                  |                                       | WP_075904242                                    | WP_075904179                  |
| <i>Moorea producenens</i> PAL-8-15-08-1                                          | CA3      | RcaE /13         | <i>a</i>    | APC/ PC/ PE | PCB/ PEB | ApcE×1/ CpcG×1/ CpcL×1 | Oscillatoriales/<br>Oscillatoriaceae     | CP017708, CP017709,<br>CP017710                                                                      | WP_070392875                  |                                       | WP_070395606                                    | WP_229424102                  |
| <i>Moorena producenens</i> JHB                                                   | CA3      | RcaE /11         | <i>a</i>    | APC/ PC/ PE | PCB/ PEB | ApcE×1/ CpcG×1/ CpcL×1 | Oscillatoriales/<br>Oscillatoriaceae     | CP017708, CP017709,<br>CP017710                                                                      | WP_071103969                  |                                       | WP_071106845                                    | WP_071106820                  |
| <i>Myxosarcina</i> sp. GI1                                                       | CA3      | RcaE /10         | <i>a</i>    | APC/ PC/ PE | PCB/ PEB | ApcE×1/ CpcG×1         | Pleurocapsales/<br>Hyellaceae            | JRFE00000000                                                                                         | WP_036483762                  |                                       | WP_036478911                                    |                               |
| <i>Nodosilinea</i> sp. LEGE 07298                                                | CA6      | RfpA / 25        | <i>a, f</i> | APC/ PC     | PCB      | ApcE×2/ CpcG×3         | Pseudanabaenales/<br>Prochlorotrichaceae | JADEXE00000000                                                                                       | WP_194021995                  | WP_194021615,<br>WP_194025230         | MBE9108339,<br>MBE9110147,<br>WP_194025998      |                               |
| <i>Nodosilinea</i> sp. P-1105                                                    | CA6      | RfpA /17         | <i>a, f</i> | APC/ PC     | PCB      | ApcE×2/ CpcG×2/ CpcL×2 | Pseudanabaenales/<br>Prochlorotrichaceae | SMDQ00000000                                                                                         | WP_169617661                  | WP_169613084,<br>WP_169614317         | NMF84091,<br>NMF84306                           | WP_206070731,<br>WP_169617321 |
| <i>Nostoc carneum</i> NIES-2107                                                  | CA3      | RcaE /44         | <i>a</i>    | APC/ PC/ PE | PCB/ PEB | ApcE×1/ CpcG×2/ CpcL×2 | Nostocales/<br>Nostocaceae               | AP018183, AP018181,<br>AP018180, AP018182                                                            | BAY29549                      |                                       | BAY32051,<br>BAY28925                           | BAY32745,<br>BAY32582         |
| <i>Nostoc commune</i> NIES-4072                                                  | CA3      | RcaE / 21        | <i>a</i>    | APC/ PC/ PE | PCB/ PEB | ApcE×1/ CpcG×2         | Nostocales/<br>Nostocaceae               | BDUD00000000                                                                                         | WP_244919223                  |                                       | WP_109012707,<br>WP_109008498                   |                               |
| <i>Nostoc flagelliforme</i> CCNUN1                                               | CA3      | RcaE /21         | <i>a</i>    | APC/ PC/ PE | PCB/ PEB | ApcE×1/ CpcG×2         | Nostocales/<br>Nostocaceae               | CP024785, CP024793,<br>CP024787, CP024791,<br>CP024789, CP024792,<br>CP024786, CP024790,<br>CP024788 | WP_100902110                  |                                       | WP_100899899,<br>WP_100897609                   |                               |
| <i>Nostoc punctiforme</i> PCC 73102                                              | CA1/ CA2 | CcaS /29         | N.F.        | APC/ PC/ PE | PCB/ PEB | ApcE×1/ CpcG×2/ CpcL×1 | Nostocales/<br>Nostocaceae               | CP001041, CP001039,<br>CP001040, CP001037,<br>CP001042, CP001038                                     | WP_012410152                  |                                       | WP_012410166,<br>WP_012407513                   | WP_012410151                  |
| <i>Nostoc</i> sp. C052                                                           | CA2      | CcaS / 37        | <i>a, f</i> | APC/ PC/ PE | PCB/ PEB | ApcE×1/ CpcG×2         | Nostocales/<br>Nostocaceae               | CP040279, CP040275,<br>CP040277, CP040272,<br>CP040278, CP040273,<br>CP040274, CP040280,<br>CP040276 | WP_179069187                  |                                       | WP_179068455,<br>WP_179067776                   |                               |
| <i>Nostoc</i> sp. CENA543                                                        | CA3      | RcaE /22         | <i>a</i>    | APC/ PC/ PE | PCB/ PEB | ApcE×1/ CpcG×1/ CpcL×2 | Nostocales/<br>Nostocaceae               | CP023281, CP023282,<br>CP023278, CP023279,<br>CP023280, CP023283                                     | WP_03138107                   |                                       | WP_103138090                                    | WP_103135424,<br>WP_103138091 |
| <i>Nostoc</i> sp. KVJ20                                                          | CA2      | CcaS /30         | <i>a</i>    | APC/ PC/ PE | PCB/ PEB | ApcE×1/ CpcG×1         | Nostocales/<br>Nostocaceae               | LSSA00000000                                                                                         | WP_069073327                  |                                       | WP_069074024                                    |                               |
| <i>Nostoc</i> sp. NIES-4103                                                      | CA3      | RcaE /24         | <i>a</i>    | APC/ PC/ PE | PCB/ PEB | ApcE×1/ CpcG×3         | Nostocales/<br>Nostocaceae               | AP018289, AP018288                                                                                   | WP_096557144                  |                                       | WP_096557152,<br>WP_096557136,<br>WP_096557781  |                               |
| <i>Oscillatoriales</i> sp. JSC-12/ <i>Leptolyngbyaceae</i> cyanobacterium JSC-12 | CA6      | RfpA /20         | <i>a, f</i> | APC/ PC     | PCB      | ApcE×2/ CpcG×4/ CpcL×1 | Pseudanabaenales/<br>Leptolyngbyaceae    | ΔJUB00000000, CM00163                                                                                | EKQ66830                      | EKQ66835,<br>EKQ66842                 | EKQ66809,<br>EKQ66811,<br>EKQ66812,<br>EKQ67899 | EKQ66810                      |

|                                                 |          |                     |                |             |          |                            |                                        |                                                                  |                               |                               |                                                                 |                               |  |
|-------------------------------------------------|----------|---------------------|----------------|-------------|----------|----------------------------|----------------------------------------|------------------------------------------------------------------|-------------------------------|-------------------------------|-----------------------------------------------------------------|-------------------------------|--|
| <i>Phormidesmis priestleyi</i> ULC007           | N.F.     | N.F./9              | <i>a</i>       | APC/ PC     | PCB      | ApcE×1/ CpcG×3             | Pseudanabaenales/<br>Leptolyngbyaceae  | PVWG00000000                                                     |                               |                               | WP_073074862,<br>WP_073074863,<br>WP_073074864                  |                               |  |
| <i>Phormidium tenue</i> FACHB-1052              | N.F.     | N.F./19             | <i>a</i>       | APC/ PC     | PCB      | ApcE×1/ CpcG×2/ CpcL×1     | Oscillatoriales/<br>Oscillatoriaceae   | JACJQN00000000                                                   |                               |                               | WP_073608152,<br>WP_073607311                                   | WP_073606855                  |  |
| <i>Plectonema cf. radiosum</i> LEGE 06105       | CA6      | RfpA /12            | <i>a, f</i>    | APC/ PC     | PCB      | ApcE×2/ CpcG×3             | Oscillatoriales/<br>Oscillatoriaceae   | JADEWL00000000                                                   | WP_193923208                  | WP_193916309,<br>WP_193923202 | WP_193926196,<br>WP_193924451,<br>WP_193924454                  |                               |  |
| <i>Pleurocapsa</i> sp. PCC 7327                 | CA6      | RfpA /13            | <i>a, f</i>    | APC/ PC/ PE | PCB/ PEB | ApcE×2/ CpcG×1/ CpcL×1     | Pleurocapsales/<br>Hyellaceae          | CP003590                                                         | WP015143524                   | WP_015143544,<br>WP_015145932 | WP_015143734                                                    | WP_015143841                  |  |
| <i>Pleurocapsales cyanobacterium</i> LEGE 10410 | CA3/ CA6 | RcaE + RfpA /<br>17 | <i>a, f</i>    | APC/ PC/ PE | PCB/ PEB | ApcE×2/ CpcG×1             | Pleurocapsales                         | JADEXJ00000000                                                   | MBE9046724/<br>MBE9046865     | MBE9046795,<br>MBE9046406     | MBE9046663                                                      |                               |  |
| <i>Pseudanabaena biceps</i> PCC 7429            | CA1      | CcaS / 15           | <i>a</i>       | APC/ PC     | PCB      | ApcE×1/ CpcG×2/ CpcL×1     | Pseudanabaenales/<br>Pseudanabaenaceae | ALWB00000000                                                     | WP_009629217                  |                               | WP_009626008,<br>WP_009627925                                   | WP_009629216                  |  |
| <i>Romeria aff. gracilis</i> LEGE 07310         | CA6      | RfpA / 6            | <i>a, f</i>    | APC/ PC     | PCB      | ApcE×2/ CpcG×1/ CpcL×2     | Pseudanabaenales/<br>Romeriaceae       | JADEXG00000000                                                   | WP_193909340                  | WP_193906269,<br>WP_193909291 | MBE9078133                                                      | WP_193904477,<br>WP_193906131 |  |
| <i>Stanieria cyanosphaera</i> PCC 7437          | CA3      | RcaE / 20           | <i>a</i>       | APC/ PC/ PE | PCB/ PEB | ApcE×1/ CpcG×4             | Pleurocapsales/<br>Dermocarpellaceae   | CP003654, CP003657,<br>CP003653, CP003655,<br>CP003656, CP003658 | WP_015194148                  |                               | WP_015194050,<br>WP_015192211,<br>WP_015191542,<br>WP_015192213 |                               |  |
| <i>Stanieria</i> sp. NIES-3757                  | CA3      | RcaE /22            | <i>a</i>       | APC/ PC/ PE | PCB/ PEB | ApcE×1/ CpcG×1             | Pleurocapsales/<br>Dermocarpellaceae   | AP017375, AP017376                                               | WP_096383955                  |                               | WP_096388020                                                    |                               |  |
| <i>Synechococcus</i> sp. PCC 7335               | CA3/ CA6 | RcaE and RfpA /15   | <i>a, d, f</i> | APC/ PC/ PE | PCB/ PEB | ApcE×2/ CpcG×1/ CpcL×1     | Synechococcales/<br>Synechococcaceae   | ABRV00000000                                                     | WP_006457142/<br>WP_038015847 | WP_006453887,<br>WP_006455341 | WP_006454437                                                    | WP_006456318                  |  |
| <i>Synechococcus</i> sp. PCC 7336               | CA3      | RcaE / 8            | <i>a</i>       | APC/ PC/ PE | PCB/ PEB | ApcE×1/ CpcG×1/ CpcL×1     | Synechococcales/<br>Synechococcaceae   | CM001776                                                         | WP_202951133                  |                               | WP_017326224                                                    | WP_017326223                  |  |
| <i>Synechococcus</i> sp. strain CC9311          | CA4      | N.F./ 0             | <i>a</i>       | APC/ PC/ PE | PCB/ PEB | ApcE×1/ CpcG×2/ CpcL×1     | Synechococcales/<br>Synechococcaceae   | NC_008319                                                        |                               |                               | sync_0515,<br>sync_2488                                         | sync_1249                     |  |
| <i>Synechococcus</i> sp. strain CC9902          | CA4      | N.F./ 0             | <i>a</i>       | APC/ PC/ PE | PCB/ PEB | ApcE×1/ CpcG×2/ CpcL×1     | Synechococcales/<br>Synechococcaceae   | NC_007513                                                        |                               |                               | Sync9902_1881,<br>Sync9902_0399                                 | Sync9902_100<br>3             |  |
| <i>Synechocystis</i> sp. PCC 6803               | CA1      | CcaS /10            | <i>a</i>       | APC/ PC     | PCB      | ApcE×1/ CpcG×1/ CpcL×1     | Synechococcales/<br>Merismopediaceae   | NC_017052.1                                                      | WP_014407164                  |                               | WP_010871747                                                    | WP_010874215                  |  |
| <i>Tolypothrix tenuis</i> PCC 7101              | CA3      | RcaE / 36           | <i>a</i>       | APC/ PC/ PE | PCB/ PEB | ApcE×1/ CpcG×2/ CpcL×2     | Nostocales/<br>Tolypothrichaceae       | AP018252, AP018250,<br>AP018253, AP018251,<br>AP018249, AP018248 | WP_096577488                  |                               | WP_096575345,<br>WP_096577410                                   | WP_096574564,<br>WP_096574038 |  |
| <i>Xenococcus</i> sp. PCC 7305                  | CA3      | RcaE /13            | <i>a</i>       | APC/ PC/ PE | PCB/ PEB | ApcE×21/ CpcG×3/<br>CpcL×1 | Pleurocapsales/<br>Xenococcaceae       | ALVZ00000000                                                     | WP_006511570                  |                               | WP_006511402,<br>WP_006510102,<br>WP_006508305                  | WP_006510547                  |  |

N.F. = not found.  
\*Photoreceptors: CcaS, RcaE and RfpA.

### Supplementary Figure S1

## Photoreceptor domain architecture

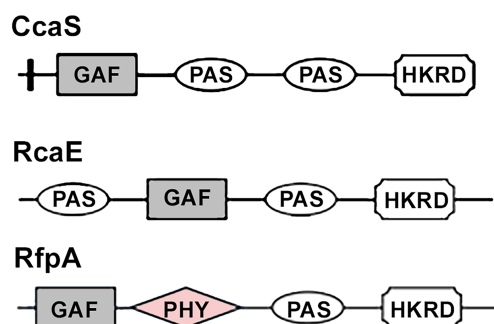

Figure S1. The architecture of known photoreceptors (CcaS, RcaE, and RfpA). Photoreceptors in different species includes a variety of functional domains. Vertical black line represents the transmembrane domains. PHY, phytochrome-like domain; GAF, cGMP phosphodiesterase/adenylate cyclase/FhlA; PAS, Per-Arnt-Sim domain; HKRD, histidine kinase-related domain.

### Supplementary Figure S2

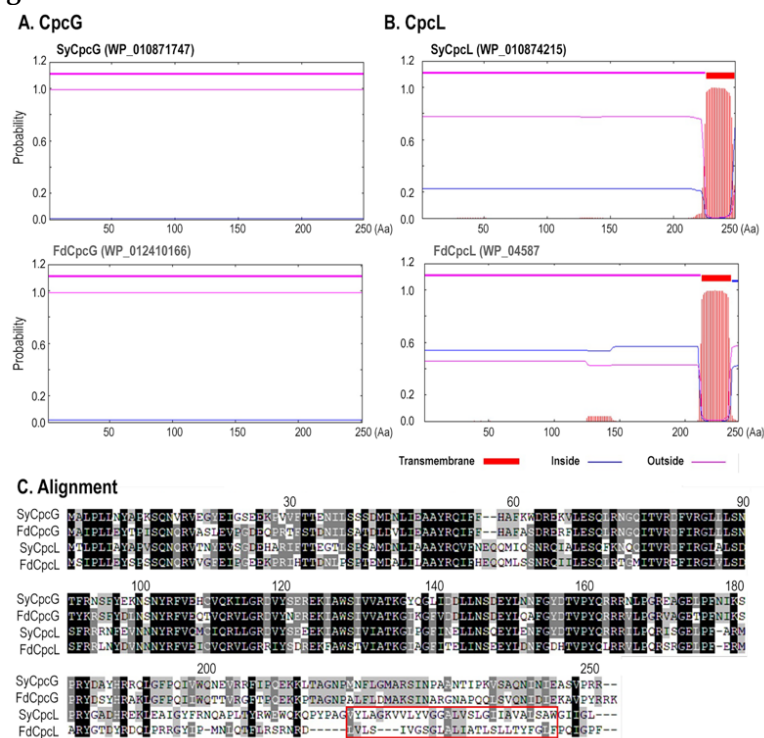

Figure S2. The differences between CpcG and CpcL. A, the predicted secondary protein structure of CpcG proteins using TMHMM program. B, the predicted secondary protein structure of CpcL proteins using TMHMM program. C, The pile-up alignment of CpcG and CpcL proteins. Sy, *Synechocystis* sp. PCC 6803; Fd, *Fremyella diplosiphon* Fd33.

# Supplementary Figure S3

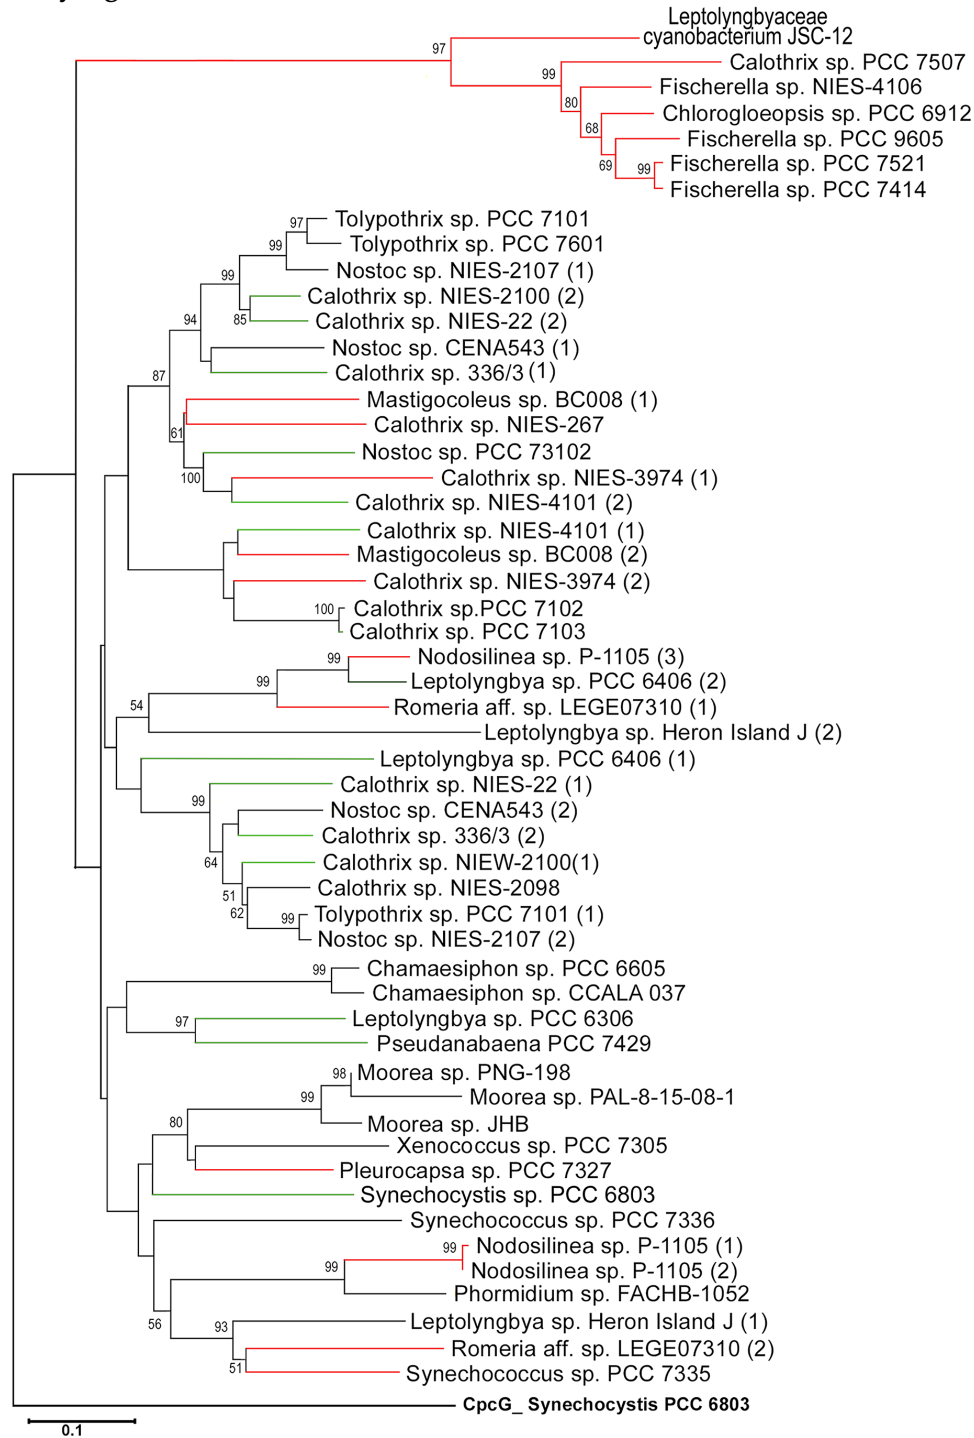

**Figure S3.** Neighbor-joining phylogeny of CpcL proteins. The number in brackets is used to distinguish multiple copies of CpcL from the same strain. The branches are supported with a bootstrap of  $\geq 50\%$  from 500 replicating calculations. CpcG from *Synechocystis* sp. PCC 6803 is used as outgroup. Green branch lines highlight CpcL from CA1-capable cyanobacteria. Red branch lines highlight CpcL from CA6-capable cyanobacteria. The CpcL sequence accessions are listed in Table S1.
